# Supplementary material
Source: PubMed Central journal article supplement (PMC5526715)
Supplement: NIHMS851742-supplement-3.pdf [file NIHMS851742-supplement-3.pdf]

**Table S2. Associations between time-dependent repeated measures of HbA1c and pre-ESRD mortality**

|              | <6%<br>HR (95% CI) | 6-6.9% | 7-7.9%<br>HR (95% CI) | 8-8.9%<br>HR (95% CI) | >9%<br>HR (95% CI) |
|--------------|--------------------|--------|-----------------------|-----------------------|--------------------|
| All patients | 1.38 (1.14, 1.68)  | Ref    | 0.93 (0.78, 1.11)     | 1.03 (0.82, 1.29)     | 1.35 (1.07, 1.71)  |

\*Adjusted for age, race, sex, coronary artery disease, congestive heart failure, cerebrovascular disease, peripheral vascular disease, smoking, BMI group, use of angiotensin converting enzyme inhibitors/angiotensin receptor blockers (ACEI/ARBs), statins and beta blockers, albumin, hemoglobin, eGFR and albuminuria. Estimates combine using MIanalyze on the 5 imputed datasets
