# Supplementary material
Source: PubMed Central journal article supplement (PMC5526715)
Supplement: NIHMS851742-supplement-4.pdf [file NIHMS851742-supplement-4.pdf]

**Table S3. Associations between HbA1c and pre-ESRD mortality and ESRD – sensitivity analyses**

|                                                   | <6%               | 6-6.9% | 7-7.9%            | 8-8.9%            | >9%               |
|---------------------------------------------------|-------------------|--------|-------------------|-------------------|-------------------|
| <b>Mortality*</b>                                 | HR (95% CI)       |        | HR (95% CI)       | HR (95% CI)       | HR (95% CI)       |
| Exclude patients with baseline malignancy         | 1.31 (1.03, 1.66) | Ref    | 1.03 (0.84, 1.26) | 1.01 (0.78, 1.32) | 1.44 (1.11, 1.87) |
| Exclude events during first 6 months of follow up | 1.28 (1.02, 1.60) | Ref    | 0.95 (0.78, 1.15) | 0.99 (0.76, 1.28) | 1.51 (1.17, 1.94) |
| <b>ESRD*</b>                                      | SHR (95% CI)      |        | SHR (95% CI)      | SHR (95% CI)      | SHR (95% CI)      |
| Exclude patients with baseline malignancy         | 0.69 (0.38, 1.23) | Ref    | 0.74 (0.48, 1.15) | 0.55 (0.31, 0.98) | 1.17 (0.74, 1.86) |
| Exclude events during first 6 months of follow up | 0.66 (0.36, 1.21) | Ref    | 0.91 (0.59, 1.40) | 0.60 (0.34, 1.08) | 1.21 (0.75, 1.96) |

\*Adjusted for age, race, sex, coronary artery disease, congestive heart failure, cerebrovascular disease, peripheral vascular disease, smoking, BMI group, use of angiotensin converting enzyme inhibitors/angiotensin receptor blockers (ACEI/ARBs), statins and beta blockers, albumin, hemoglobin, eGFR and albuminuria. Estimates combine using MIanalyze on the 5 imputed datasets
