# Supplementary material
Source: PubMed Central journal article supplement (PMC5526715)

**Figure S1.** Flow chart showing how patients were selected to be included in this analysis.

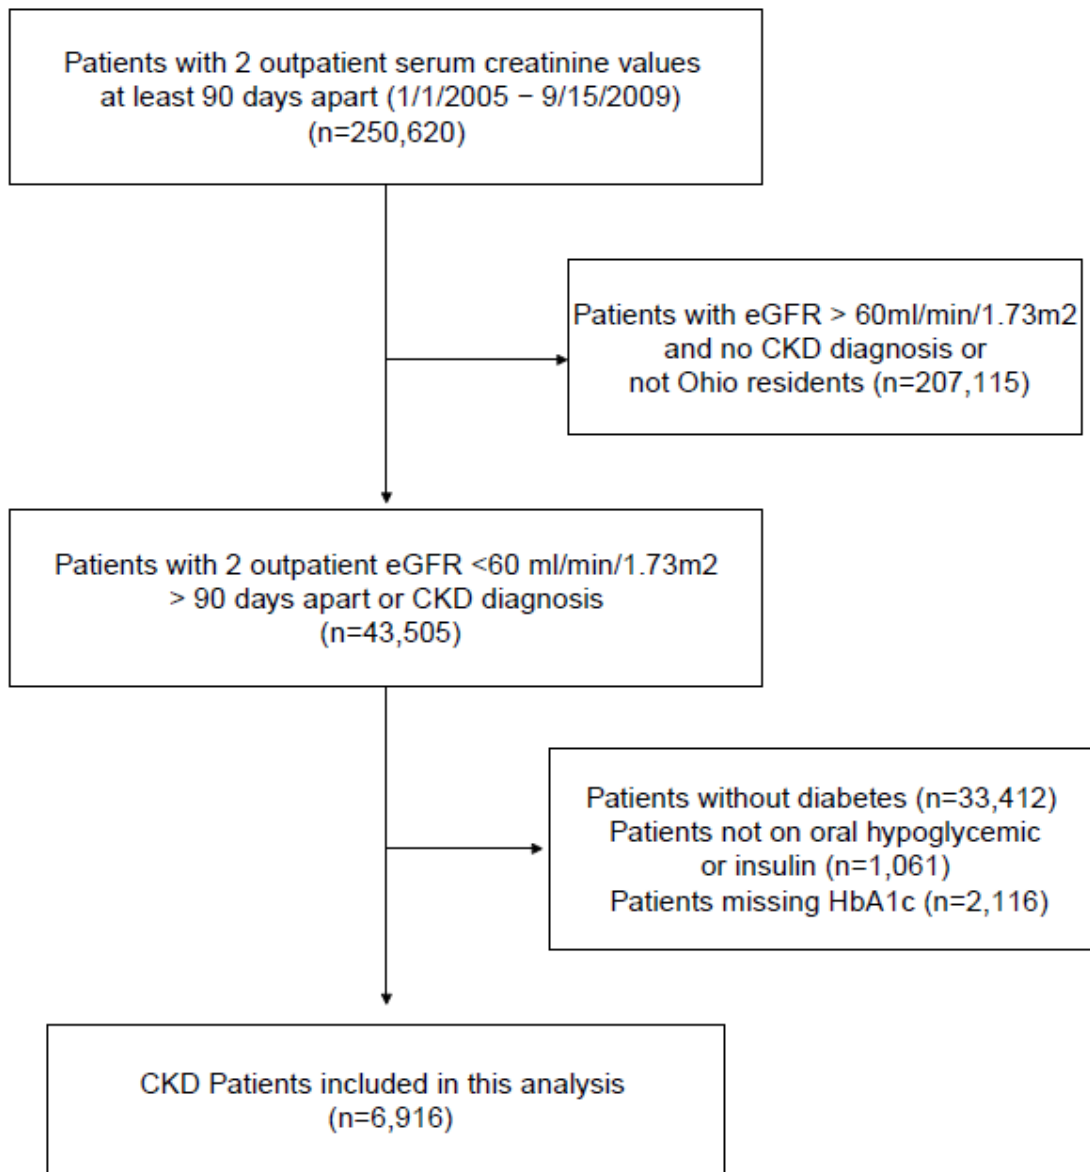

Supplement: NIHMS851742-supplement-1.pdf [file NIHMS851742-supplement-1.pdf]
